# Supplementary material for: Identifying transcription factors that reduce wood recalcitrance and improve enzymatic degradation of xylem cell wall in Populus
Source: PubMed Central journal article supplement (PMC7744511; doi:10.1038/s41598-020-78781-6), 2020-12-16
Supplement: 41598_2020_78781_MOESM1_ESM.pdf [file 41598_2020_78781_MOESM1_ESM.pdf]

**Supplementary information for**  
**Identifying transcription factors that reduce wood recalcitrance and improve**  
**enzymatic degradation of xylem cell wall in poplar**

**Chiaki Hori,<sup>1†\*</sup> Naoki Takata,<sup>2†</sup> Pui Ying Lam,<sup>3</sup> Yuki Tobimatsu,<sup>3</sup>**

**Soichiro Nagano,<sup>4</sup> Jenny C. Mortimer,<sup>5</sup> Dan Cullen,<sup>6</sup>**

<sup>1</sup>Research Faculty of Engineering, Hokkaido University, Sapporo 060-8628, Japan

<sup>2</sup>Forest Bio-Research Center, Forestry and Forest Products Research Institute, Forest Research and Management Organization, Hitachi, Ibaraki 319-1301, Japan

<sup>3</sup>Research Institute for Sustainable Humanosphere, Kyoto University, Uji, Kyoto, 611-0011, Japan

<sup>4</sup>Forest Tree Breeding Center, Forestry and Forest Products Research Institute, Forest Research and Management Organization, Hitachi, Ibaraki 319-1301, Japan

<sup>5</sup>Joint BioEnergy Institute, Environmental Genomics and Systems Biology Division, Lawrence Berkeley National Laboratory, Berkeley, CA 94720, USA

<sup>6</sup>U. S. Department of Agriculture, Forest Products Laboratory, Madison, WI 53726, USA

†These authors equally contributed to this study.

\*Corresponding author

Chiaki Hori, PhD.

Assistant Professor, Hokkaido University

Email, [chori@eng.hokudai.ac.jp](mailto:chori@eng.hokudai.ac.jp); Phone, +81-11-706-6612; Fax, +81-11-706-6612

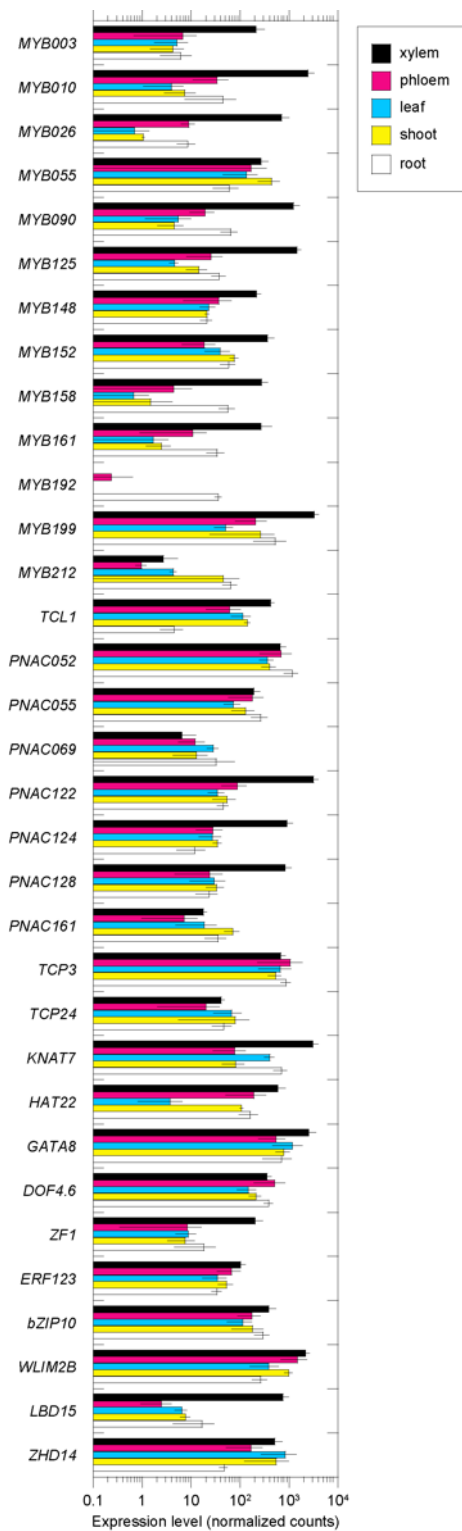

Figure S1. Expression pattern of target TFs in xylem, phloem, leaf, shoot, and root tissues in poplar. RNA sequencing dataset (GSE81077)<sup>1</sup> was retrieved and re-analyzed.

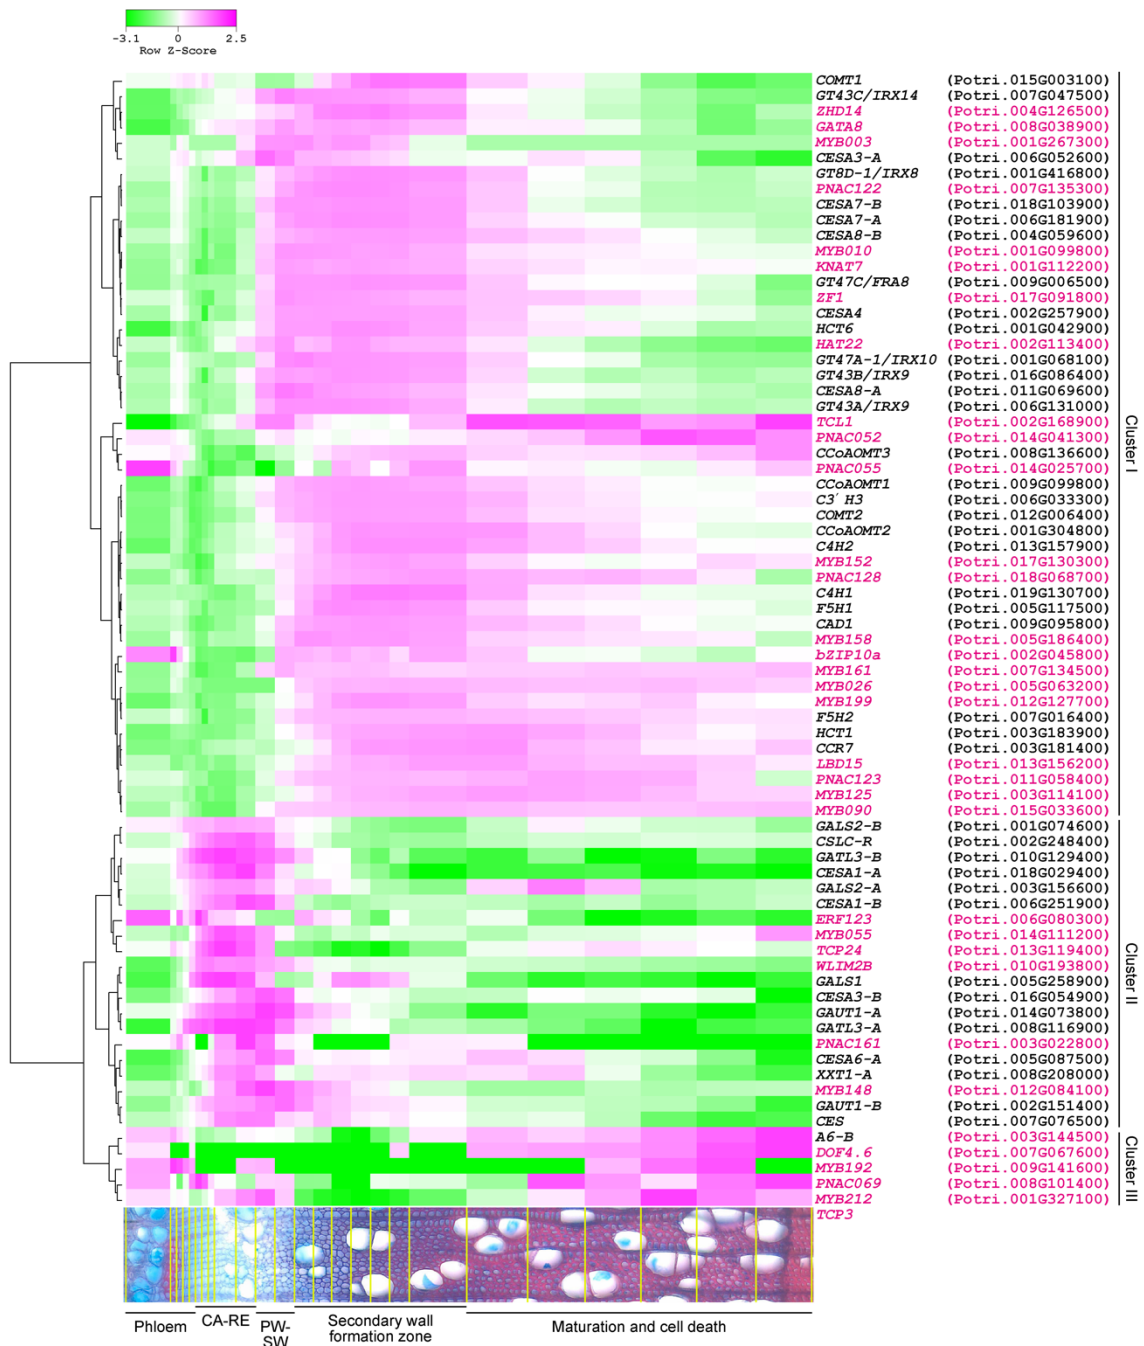

Figure S2. Gene expression patterns of 33 target TFs during xylem formation (gene names in magenta) together with 40 biosynthetic enzymes of cellulose, hemicellulose and lignin (gene names in black), based on the information deposited in the AspWood database (<http://aspwood.popgenie.org/aspwood-v3.0/>)<sup>2</sup>. Classification of stem tissue was referred to Kumar et al (2019)<sup>3</sup>. CA-RE; cambium and radial expansion zone. PW-SW; Primary to secondary wall transition.

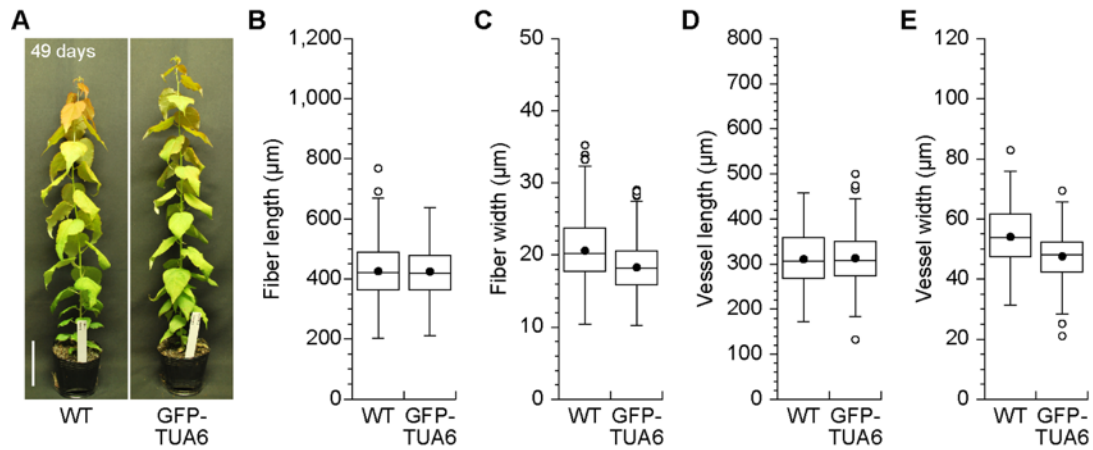

Figure S3. Transgenic hybrid aspen overexpressing GFP-TUA6 and wild-type (WT) plants. Phenotypes of 49-days-old WT and GFP-TUA6 (A). Scale bar = 10 cm. Xylem fiber lengths (B) and widths (C), and vessel element lengths (D) and widths (E). Stem samples were macerated in a solution of 30% hydrogen peroxide and glacial acetic acid (1:1) at 95°C for five hours. Xylem cells were imaged using a Leica DMR microscope (Leica Microsystems, Wetzlar, Germany). Length and width were measured using ImageJ software. Six hundred fiber cells and 195 vessel cells were estimated from three trees per genotype.

Table S1. Oligonucleotides used in this study.

| Primer Name      | Sequence (5'-3')                | Target Gene                 | Experiment             |
|------------------|---------------------------------|-----------------------------|------------------------|
| MYB003.TOPO.for  | CACCATGATGAGGAAGCCGGAT          | <i>Pt</i> × <i>tMYB003</i>  | Cloning of target gene |
| MYB003.TOPO.rev  | TACTACTTGAAATCAAGTAAAGG         | <i>Pt</i> × <i>tMYB003</i>  | Cloning of target gene |
| MYB010.TOPO.for  | CACCATGATGGGTCACCATTCTTGCTGC    | <i>Pt</i> × <i>tMYB010</i>  | Cloning of target gene |
| MYB010.TOPO.rev  | TAGAGATGAAGGGAAAGAAGAGA         | <i>Pt</i> × <i>tMYB010</i>  | Cloning of target gene |
| MYB026.TOPO.for  | CACCATGATGGAAGATTTTAGGGGTAGC    | <i>Pt</i> × <i>tMYB026</i>  | Cloning of target gene |
| MYB026.TOPO.rev  | AGAGATCCCACACCAAGAAAG           | <i>Pt</i> × <i>tMYB026</i>  | Cloning of target gene |
| MYB055.TOPO.for  | CACCATGGGAGGCACTCTTGTTGCT       | <i>PniMYB055</i>            | Cloning of target gene |
| MYB055.TOPO.rev  | AATATATCCATATGATGCTGTAAG        | <i>PniMYB055</i>            | Cloning of target gene |
| MYB090.TOPO.for  | CACCATGATGTGTACTAGAGGCC         | <i>Pt</i> × <i>tMYB090</i>  | Cloning of target gene |
| MYB090.TOPO.rev  | AGCTGAGAAAAATCAATGAATG          | <i>Pt</i> × <i>tMYB090</i>  | Cloning of target gene |
| MYB125.TOPO.for  | CACCATGATGGGAAGGCAACCTTGCTGTG   | <i>Pt</i> × <i>tMYB125</i>  | Cloning of target gene |
| MYB125.TOPO.rev  | GCGATTGAGTCCATCTCTA             | <i>Pt</i> × <i>tMYB125</i>  | Cloning of target gene |
| MYB148.TOPO.for  | CACCATGGGACGACATTCTTGTTGTTG     | <i>Pt</i> × <i>tMYB148</i>  | Cloning of target gene |
| MYB148.TOPO.rev  | TATCTGGTGAAGCCATCGA             | <i>Pt</i> × <i>tMYB148</i>  | Cloning of target gene |
| MYB152.TOPO.for  | CACCATGGGAAGGCAACCATGT          | <i>PniMYB152</i>            | Cloning of target gene |
| MYB152.TOPO.rev  | CAAGAGCCCATTGTCCAAG             | <i>PniMYB152</i>            | Cloning of target gene |
| MYB158.TOPO.for  | CACCATGATGGAGGAATCTTTGGCTGGT    | <i>Pt</i> × <i>tMYB158</i>  | Cloning of target gene |
| MYB158.TOPO.rev  | AGAAGATATACCCACACCAAG           | <i>Pt</i> × <i>tMYB158</i>  | Cloning of target gene |
| MYB161.TOPO.for  | CACCATGATGTCTAGCAGAGGCCA        | <i>Pt</i> × <i>tMYB161</i>  | Cloning of target gene |
| MYB161.TOPO.rev  | CAATCCACTAACTTGGTTTCCAGC        | <i>Pt</i> × <i>tMYB161</i>  | Cloning of target gene |
| MYB192.TOPO.for  | CACCATGATGGGAAAAGGGAGAGCAC      | <i>Pt</i> × <i>tMYB192</i>  | Cloning of target gene |
| MYB192.TOPO.rev  | TAAAGAAGGCCACAAATGAA            | <i>Pt</i> × <i>tMYB192</i>  | Cloning of target gene |
| MYB199.TOPO.for  | CACCATGATGGGTAGACAACCTTGTTG     | <i>Pt</i> × <i>tMYB199</i>  | Cloning of target gene |
| MYB199.TOPO.rev  | ATGCTTGCCACCCATGTCTA            | <i>Pt</i> × <i>tMYB199</i>  | Cloning of target gene |
| MYB212.TOPO.for  | CACCATGATGGATGTTAAAGGCAACAGCAAC | <i>Pt</i> × <i>tMYB212</i>  | Cloning of target gene |
| MYB212.TOPO.rev  | CAAGTTGTTTAGCTGCTGCTGAAGAAC     | <i>Pt</i> × <i>tMYB212</i>  | Cloning of target gene |
| TCL1.TOPO.for    | CACCATGGATAGACGTCGAAGAAGCG      | <i>Pt</i> × <i>tTCL1</i>    | Cloning of target gene |
| TCL1.TOPO.rev    | AGAGGTATTCGGAATTACATCTCT        | <i>Pt</i> × <i>tTCL1</i>    | Cloning of target gene |
| PNAC052.TOPO.for | CACCATGCTCTTGCAGCAATCCAGGTG     | <i>Pt</i> × <i>tPNAC052</i> | Cloning of target gene |

|                  |                                    |                              |                        |
|------------------|------------------------------------|------------------------------|------------------------|
| PNAC052.TOPO.rev | GAAGAAGAAGTAAAATGGAACGAAGC         | <i>Pt</i> × <i>t</i> PNAC052 | Cloning of target gene |
| PNAC055.TOPO.for | CACCATGGAAGAGAGCAACACAAACCCCAAAAC  | <i>Pt</i> × <i>t</i> PNAC055 | Cloning of target gene |
| PNAC055.TOPO.rev | ATCCACAAGATCATCCAGCTCTATAAAATC     | <i>Pt</i> × <i>t</i> PNAC055 | Cloning of target gene |
| PNAC069.TOPO.for | CACCATGGATGAAATGCCATTACAGCTTGATC   | <i>Pt</i> × <i>t</i> PNAC069 | Cloning of target gene |
| PNAC069.TOPO.rev | GAAATTCAAAATGTCTGCATAATGGGCAA      | <i>Pt</i> × <i>t</i> PNAC069 | Cloning of target gene |
| PNAC122.TOPO.for | CACCATGACTTGGTGAATGACTG            | <i>Pni</i> PNAC122           | Cloning of target gene |
| PNAC122.TOPO.rev | AGGGATACGAGAAGATCC                 | <i>Pni</i> PNAC122           | Cloning of target gene |
| PNAC124.TOPO.for | CACCATGATGACATGGTGAATAATAATTC      | <i>Pt</i> × <i>t</i> PNAC124 | Cloning of target gene |
| PNAC124.TOPO.rev | TTTTCTCTGAAGCTTTCCCTTG             | <i>Pt</i> × <i>t</i> PNAC124 | Cloning of target gene |
| PNAC128.TOPO.for | CACCATGAGTACTAAGTGAATATGGC         | <i>Pt</i> × <i>t</i> PNAC128 | Cloning of target gene |
| PNAC128.TOPO.rev | CCCATGATGATCCTGGTT                 | <i>Pt</i> × <i>t</i> PNAC128 | Cloning of target gene |
| PNAC161.TOPO.for | CACCATGGCTGCCAATCTTCCCTCT          | <i>Pt</i> × <i>t</i> PNAC161 | Cloning of target gene |
| PNAC161.TOPO.rev | ATTTGGCAAATTTATTCATCAAG            | <i>Pt</i> × <i>t</i> PNAC161 | Cloning of target gene |
| TCP3.TOPO.for    | CACCATGGATCCCAAGGGCTCTAACTCAA      | <i>Pt</i> × <i>t</i> TCP3    | Cloning of target gene |
| TCP3.TOPO.rev    | CTGCCCTGATCCTTGTGAATCATCT          | <i>Pt</i> × <i>t</i> TCP3    | Cloning of target gene |
| TCP24.TOPO.for   | CACCATGAAGAACAACGGAGAAATTATTCAGG   | <i>Pt</i> × <i>t</i> TCP24   | Cloning of target gene |
| TCP24.TOPO.rev   | ATTCTGAGAATTTGGAGAAGAGTGTGGC       | <i>Pt</i> × <i>t</i> TCP24   | Cloning of target gene |
| KNAT7.TOPO.for   | CACCATGCAAGAACCAAACCTGGGC          | <i>Pni</i> KNAT7             | Cloning of target gene |
| KNAT7.TOPO.rev   | CCTTTTGCCTTGGACTCA                 | <i>Pni</i> KNAT7             | Cloning of target gene |
| HAT22.TOPO.for   | CACCATGATGGGTTTTGGAACACTACTGATGATC | <i>Pt</i> × <i>t</i> HAT22   | Cloning of target gene |
| HAT22.TOPO.rev   | GCAAGCTGCGGATGAGTGGGTATC           | <i>Pt</i> × <i>t</i> HAT22   | Cloning of target gene |
| GATA8.TOPO.for   | CACCATGATTGGACAGACAAATACTACTAGTAAT | <i>Pni</i> GATA8             | Cloning of target gene |
| GATA8.TOPO.rev   | TATGTAATCCATTGCAGGGTTGCTC          | <i>Pni</i> GATA8             | Cloning of target gene |
| DOF4.6.TOPO.for  | CACCATGGATACTGCTCAGTGGCCACAG       | <i>Pt</i> × <i>t</i> DOF4.6  | Cloning of target gene |
| DOF4.6.TOPO.rev  | CCATGATCCTCCACCTAACATT             | <i>Pt</i> × <i>t</i> DOF4.6  | Cloning of target gene |
| ZF1.TOPO.for     | CACCATGAAGAAGAATCAAGAAAAGGTGCA     | <i>Pni</i> ZF1               | Cloning of target gene |
| ZF1.TOPO.rev     | GTTGGCTATAAGACCCACCAGTG            | <i>Pni</i> ZF1               | Cloning of target gene |
| ERF123.TOPO.for  | CACCATGGATCCCTGTCTCAGTCTCTGTGTC    | <i>Pt</i> × <i>t</i> ERF123  | Cloning of target gene |
| ERF123.TOPO.rev  | GAGGGAGTCTATCCATTCTATGTCCAG        | <i>Pt</i> × <i>t</i> ERF123  | Cloning of target gene |
| bZIP10.TOPO.for  | CACCATGAATAGTGTCTTCTCAGTGGACGA     | <i>Pt</i> × <i>tb</i> ZIP10  | Cloning of target gene |
| bZIP10.TOPO.rev  | TTTCTTTTGGCATCCCTCGCAACC           | <i>Pt</i> × <i>tb</i> ZIP10  | Cloning of target gene |
| WLIM2B.TOPO.for  | CACCATGTCGTTTACTGGTACCCAACAGAA     | <i>Pt</i> × <i>t</i> WLIM2B  | Cloning of target gene |

|                     |                                                    |                             |                        |
|---------------------|----------------------------------------------------|-----------------------------|------------------------|
| WLIM2B.TOPO.rev     | AGCCTCTGGCACAGAAGCCGCTG                            | <i>Pt</i> × <i>t</i> WLIM2B | Cloning of target gene |
| LBD15.TOPO.for      | CACCATGTCCAGAGACAGGGAGAGA                          | <i>Pt</i> × <i>t</i> LBD15  | Cloning of target gene |
| LBD15.TOPO.rev      | ATCAAAATATGGGACATTATTATC                           | <i>Pt</i> × <i>t</i> LBD15  | Cloning of target gene |
| ZHD14.TOPO.for      | CACCATGGACATAACCCAGCAACAGCAAC                      | <i>Pt</i> × <i>t</i> ZHD14  | Cloning of target gene |
| ZHD14.TOPO.rev      | AGAAGATGAAGAAGAACCATTAGTCC                         | <i>Pt</i> × <i>t</i> ZHD14  | Cloning of target gene |
| NLS-TagRFP.TOPO.for | CACCATGCCTAAGAAGAAGCGTAAGGTTGGAGGAGTGTCTAAGGGCGAAG | <i>TagRFP</i>               | Cloning of TagRFP      |
| TagRFP.TOPO.rev     | ATTAAGTTTGTGCCCCAGTTTG                             | <i>TagRFP</i>               | Cloning of TagRFP      |
| PtUBQ.for           | GGTTGATTTTGTCTGGGAAGC                              | <i>Pt</i> × <i>t</i> UBQ    | Real-time PCR          |
| PtUBQ.rev           | GATCTTGGCCTTCACGTTGT                               | <i>Pt</i> × <i>t</i> UBQ    | Real-time PCR          |
| TagRFP.for          | CAGGACGGCTGCCTCATCT                                | <i>TagRFP</i>               | Real-time PCR          |
| TagRFP.rev          | GCCGTTGGATGGGAAGTTC                                | <i>TagRFP</i>               | Real-time PCR          |
| Ptt18S.RT.for       | TCAACTTTCGATGGTAGGATAGTG                           | <i>Pt</i> × <i>t</i> 18S    | Real-time PCR          |
| Ptt18S.RT.rev       | CCGTGTCAGGATTGGGTAATTT                             | <i>Pt</i> × <i>t</i> 18S    | Real-time PCR          |
| PAL1.RT.for         | CGTGAAGATGTCTTTGCTTACGCC                           | <i>Pt</i> × <i>t</i> PAL1   | Real-time PCR          |
| PAL1.RT.rev         | GCGTTCTTCTCATTCTCTCCATTTG                          | <i>Pt</i> × <i>t</i> PAL1   | Real-time PCR          |
| PAL2.RT.for         | GCTGTGGGACCCAATGGAGAAA                             | <i>Pt</i> × <i>t</i> PAL2   | Real-time PCR          |
| PAL2.RT.rev         | GAACCAACAGCAGTACCATTTACA                           | <i>Pt</i> × <i>t</i> PAL2   | Real-time PCR          |
| PAL3.RT.for         | CGTGAATATGTCTTTGCCTATGTGG                          | <i>Pt</i> × <i>t</i> PAL3   | Real-time PCR          |
| PAL3.RT.rev         | TCCATTTTCCAACGCATGGTCAAC                           | <i>Pt</i> × <i>t</i> PAL3   | Real-time PCR          |
| PAL4.RT.for         | GCAATTGGACCCAATGGAGAGC                             | <i>Pt</i> × <i>t</i> PAL4   | Real-time PCR          |
| PAL4.RT.rev         | CAGAACCCACTGCAGTACTATTACT                          | <i>Pt</i> × <i>t</i> PAL4   | Real-time PCR          |
| C4H2.RT.for         | AAACCCTGAGGCTGCAACCAA                              | <i>Pt</i> × <i>t</i> C4H1   | Real-time PCR          |
| C4H2.RT.rev         | CTCCTCTCACCATTCAAAGCCTTG                           | <i>Pt</i> × <i>t</i> C4H1   | Real-time PCR          |
| C4H1.RT.for         | AAACCCCGAGGCTGCAACTCAT                             | <i>Pt</i> × <i>t</i> C4H2   | Real-time PCR          |
| C4H1.RT.rev         | GCTCCTCTCACCATTCAAAGCCTTA                          | <i>Pt</i> × <i>t</i> C4H2   | Real-time PCR          |
| 4CL3.RT.for         | CACACAGAGGTGCCATGATC                               | <i>Pt</i> × <i>t</i> 4CL3   | Real-time PCR          |
| 4CL3.RT.rev         | GCCTGTGTTATCAGAAGCTTTGCTC                          | <i>Pt</i> × <i>t</i> 4CL3   | Real-time PCR          |
| 4CL5.RT.for         | CACACAGGGGTGCCATTACT                               | <i>Pt</i> × <i>t</i> 4CL5   | Real-time PCR          |
| 4CL5.RT.rev         | GCCTGTGTTATCAAAAAGCTTTGCTC                         | <i>Pt</i> × <i>t</i> 4CL5   | Real-time PCR          |
| CSE1.RT.for         | CCATGAGAGAAATCGCCAGAGCC                            | <i>Pt</i> × <i>t</i> CSE1   | Real-time PCR          |
| CSE1.RT.rev         | ACGTCACCCCATCGGCGGTC                               | <i>Pt</i> × <i>t</i> CSE1   | Real-time PCR          |
| CSE2.RT.for         | CCATGAGGGAAATTGCTAGGATG                            | <i>Pt</i> × <i>t</i> CSE2   | Real-time PCR          |

|                 |                             |                             |                  |
|-----------------|-----------------------------|-----------------------------|------------------|
| CSE2.RT.rev     | CATGCCACCCCATCAGCCGTG       | <i>Pt</i> × <i>iCSE2</i>    | Real-time<br>PCR |
| HCT1.RT.for     | TTTTATAGGCCACAGGTGCCT       | <i>Pt</i> × <i>HCT1</i>     | Real-time<br>PCR |
| HCT1.RT.rev     | CCTGCCATAGGGTAGAATGGT       | <i>Pt</i> × <i>HCT1</i>     | Real-time<br>PCR |
| HCT6.RT.for     | GGCTGAGACCACCTCAGTTATAGA    | <i>Pt</i> × <i>HCT6</i>     | Real-time<br>PCR |
| HCT6.RT.rev     | CGCCAGAGTAATCCACAGTAGGT     | <i>Pt</i> × <i>HCT6</i>     | Real-time<br>PCR |
| C3'H3.RT.for    | CTCAGGCCCTTCCTTACTTACAATG   | <i>Pt</i> × <i>C3'H3</i>    | Real-time<br>PCR |
| C3'H3.RT.rev    | GTAGCCACCAACTTTCACATTGGC    | <i>Pt</i> × <i>C3'H3</i>    | Real-time<br>PCR |
| CCoAOMT1.RT.for | AGCCAGGCAGGAAGGCACCAG       | <i>Pt</i> × <i>CCoAOMT1</i> | Real-time<br>PCR |
| CCoAOMT1.RT.rev | CATGCATTCAGGCTCTCTTGGG      | <i>Pt</i> × <i>CCoAOMT1</i> | Real-time<br>PCR |
| CCoAOMT2.RT.for | ACTCAGGCCGGAAGGCATCAA       | <i>Pt</i> × <i>CCoAOMT2</i> | Real-time<br>PCR |
| CCoAOMT2.RT.rev | ATGCATTCAGGCTCTCTTGGG       | <i>Pt</i> × <i>CCoAOMT2</i> | Real-time<br>PCR |
| CCoAOMT3.RT.for | AACTAGTGCATATCCTGGGGAGC     | <i>Pt</i> × <i>CCoAOMT3</i> | Real-time<br>PCR |
| CCoAOMT3.RT.rev | CCTTCATCAACTGGCACAGACATC    | <i>Pt</i> × <i>CCoAOMT3</i> | Real-time<br>PCR |
| CCR7.RT.for     | AAACCAGAAGCTAAGGGATCTGGG    | <i>Pt</i> × <i>CCR2</i>     | Real-time<br>PCR |
| CCR7.RT.rev     | TTCACAGACTCTTCTGCAGCTTG     | <i>Pt</i> × <i>CCR2</i>     | Real-time<br>PCR |
| F5H1.RT.for     | ACTACTCCGAAGAGGCTGAAACC     | <i>Pt</i> × <i>F5H1</i>     | Real-time<br>PCR |
| F5H1.RT.rev     | CTCGTTTACTTTTGTCTCTTCACTG   | <i>Pt</i> × <i>F5H1</i>     | Real-time<br>PCR |
| F5H2.RT.for     | AAGCCAATATAGGCAAGCCTGTGAATC | <i>Pt</i> × <i>F5H2</i>     | Real-time<br>PCR |
| F5H2.RT.rev     | ATTTTtagccccgaaagctgctctg   | <i>Pt</i> × <i>F5H2</i>     | Real-time<br>PCR |
| COMT1.RT.for    | GGGAATGTCTGACCACTTACCATTA   | <i>Pt</i> × <i>COMT1</i>    | Real-time<br>PCR |
| COMT1.RT.rev    | AGCTCCAGTCCCGCCACCAACAT     | <i>Pt</i> × <i>COMT1</i>    | Real-time<br>PCR |
| COMT2.RT.for    | AGCACAATCGTCTCCAAGTACCCT    | <i>Pt</i> × <i>COMT2</i>    | Real-time<br>PCR |
| COMT2.RT.rev    | AACATTCTCCACACCAGGGAAAGC    | <i>Pt</i> × <i>COMT2</i>    | Real-time<br>PCR |
| CAD1.RT.for     | TGTGGTGAGAAATTCCTGATGGG     | <i>Pt</i> × <i>CAD1</i>     | Real-time<br>PCR |
| CAD1.RT.rev     | CTCTTAGCCCACTCTGTTTCAG      | <i>Pt</i> × <i>CAD1</i>     | Real-time<br>PCR |
| CESA1-B.RT.for  | GGATGGAGATGAGGATGAAGATGAT   | <i>Pt</i> × <i>CESA1-B</i>  | Real-time<br>PCR |
| CESA1-B.RT.rev  | ACCCTGCCACTGACGCCTTGCC      | <i>Pt</i> × <i>CESA1-B</i>  | Real-time<br>PCR |
| CESA3-A.RT.for  | GGTGGATCCCGGAAGAAGAGTTTCAG  | <i>Pt</i> × <i>CESA3-A</i>  | Real-time<br>PCR |
| CESA3-A.RT.rev  | AAGTAGGGTCAACATGCTTGCTCG    | <i>Pt</i> × <i>CESA3-A</i>  | Real-time<br>PCR |
| CESA6-A.RT.for  | GCACTTATTGTACCACCACACATG    | <i>Pt</i> × <i>CESA6-A</i>  | Real-time<br>PCR |
| CESA6-A.RT.rev  | TTGGAACCATTGGTCTTGGTTGAG    | <i>Pt</i> × <i>CESA6-A</i>  | Real-time<br>PCR |
| CESA6-B.RT.for  | GCACTTATTGTTCCACCGAGTC      | <i>Pt</i> × <i>CESA6-B</i>  | Real-time<br>PCR |



|               |                           |                             |                  |
|---------------|---------------------------|-----------------------------|------------------|
| CEA6-B.RT.rev | TTGGAACCATTTGGTCTTGGTTGAG | <i>Pt</i> × <i>i</i> CEA6-B | Real-time<br>PCR |
| CEA4.RT.for   | GGTGCATCCATGCTCCTTTT      | <i>Pt</i> × <i>i</i> CEA4   | Real-time<br>PCR |
| CEA4.RT.rev   | GAACCCACCTTCTAGCAAACCTCA  | <i>Pt</i> × <i>i</i> CEA4   | Real-time<br>PCR |
| CEA7-B.RT.for | GATACATGTGCATCCTGCTTCTAA  | <i>Pt</i> × <i>i</i> CEA7-B | Real-time<br>PCR |
| CEA7-B.RT.rev | CATCTCCATCTTAGTCAGTTTATAC | <i>Pt</i> × <i>i</i> CEA7-B | Real-time<br>PCR |
| CEA8-B.RT.for | TTGCTGAGCTACCTCCAATAAG    | <i>Pt</i> × <i>i</i> CEA8-B | Real-time<br>PCR |
| CEA8-B.RT.rev | AGGGAAACTACAACGAGGATCA    | <i>Pt</i> × <i>i</i> CEA8-B | Real-time<br>PCR |

## References

1. Shi, R. *et al.* Tissue and cell-type co-expression networks of transcription factors and wood component genes in *Populus trichocarpa*. *Planta* **245**, 927–938 (2017).
2. Sundell, D. *et al.* AspWood: High-spatial-resolution transcriptome profiles reveal uncharacterized modularity of wood formation in *Populus tremula*. *Plant Cell* **29**, 1585–1604 (2017).
3. Kumar, V. *et al.* Poplar carbohydrate-active enzymes: whole-genome annotation and functional analyses based on RNA expression data. *Plant J.* **99**, 589–609 (2019).
